# Supplementary material for: The Zinc-Metallothionein Redox System Reduces Oxidative Stress in Retinal Pigment Epithelial Cells
Source: Nutrients. 2018 Dec 2;10(12):1874. doi: 10.3390/nu10121874 (PMC6315569; doi:10.3390/nu10121874)

# The zinc-metallothionein redox system reduces oxidative stress in retinal pigment epithelial cells

Sara Rodríguez-Menéndez<sup>1,2</sup>, Montserrat García<sup>1,3,\*</sup>, Beatriz Fernández<sup>1,2,\*</sup>, Lydia Álvarez<sup>1</sup>, Andrés Fernández-Vega-Cueto<sup>1</sup>, Miguel Coca-Prados<sup>1,4</sup>, Rosario Pereiro<sup>1,2</sup> and Héctor González-Iglesias<sup>1,2,3</sup>

<sup>1</sup> Instituto Universitario Fernández-Vega (Fundación de Investigación Oftalmológica Fernández-Vega, Universidad de Oviedo), Spain; l.alvarez@fio.as (L.A.) Affiliation 1; e-mail@e-mail.com

<sup>2</sup> Department of Physical and Analytical Chemistry, Faculty of Chemistry, University of Oviedo, Julián Clavería, 8, 33006, Oviedo, Spain; rodriguezmenendez.sara@gmail.com (S.R.M.); fernandezbeatriz@uniovi.es (B.F); mrpereiro@uniovi.es (R.P.); gonzalezhector@uniovi.es (H.G.I.)

<sup>3</sup> Instituto Oftalmológico Fernández-Vega, Avda. Dres. Fernández-Vega, 34, 33012, Oviedo, Spain; mgarcia@fio.as (M.G.); h.gonzalez@fio.as (H.G.I.)

<sup>4</sup> Department of Ophthalmology and Visual Sciences, Yale University School of Medicine, 300 George St, 8100A, New Haven, CT. 06510, USA; miguel.coca-prados@yale.edu (M.C.P.)

\* Correspondence: mgarciadiaz@fio.as, Tel.: +34-985-24-0141; fernandezbeatriz@uniovi.es, Tel.: +34-985-10-3524

Received: date; Accepted: date; Published: date

**Abstract:** The Supplementary Material includes the supplemental information of optimal instrumental settings for ICP-MS analysis, the MT specific isoforms gene expression in HREPs cells, the concentration of zinc in MTs, in proteins/biomolecules other than MTs, and in all zinc-binding proteins/biomolecules, and the concentration of MTs (<sup>nat</sup>Zn-MTs and <sup>68</sup>Zn-MTs), obtained by IDA-, IPD-, SEC (HPLC)-ICP-MS, under selected experimental conditions.

## 1. Tables

**Table S1.** ICP-MS instrumental operating conditions. Data acquisition parameters and optimized chromatographic conditions for Zn-MT quantification by HPLC-ICP-MS analysis.

| Sector Field ICP-MS (Element 2) |                                                |                                                                          |
|---------------------------------|------------------------------------------------|--------------------------------------------------------------------------|
| Plasma parameters               | RF power (W)                                   | 1295                                                                     |
|                                 | Cooling gas flow rate (L·min <sup>-1</sup> )   | 15.94                                                                    |
|                                 | Sample gas flow rate (L·min <sup>-1</sup> )    | 0.80                                                                     |
|                                 | Auxiliary gas flow rate (L·min <sup>-1</sup> ) | 0.88                                                                     |
| Data acquisition parameters     | Acquisition mode                               | Time resolved analysis                                                   |
|                                 | Monitored isotopes                             | <sup>32,33,34</sup> S, <sup>64,66,67,68,70</sup> Zn, <sup>63,65</sup> Cu |
|                                 | Resolution                                     | Medium (R~4000)                                                          |
| Chromatographic Conditions      |                                                |                                                                          |
| SEC-HPLC                        | Size exclusion column                          | Superdex™ Peptide 10/300 GL (MW range: 100-7000 Da)                      |
|                                 | Mobile phase                                   | 25 mM Tris/HCl pH=7.4                                                    |
|                                 | Flow rate (mL·min <sup>-1</sup> )              | 0.6                                                                      |
|                                 | Injection volume (μL)                          | 50                                                                       |

**Table S2.** MT specific isoforms gene expression. MT specific isoforms gene expression in HRPEsv before (control) and after being exposed independently to the following reagents, for 24 h: i) 100 μM

$^{68}\text{ZnSO}_4$ ; ii)  $100 \text{ U}\cdot\text{mL}^{-1}$  interleukin-1 $\alpha$  (IL1 $\alpha$ ); iii)  $120 \text{ U}\cdot\text{mL}^{-1}$  Erythropoietin (EPO); iv)  $5 \mu\text{M}$  Lutein; v)  $5 \mu\text{M}$  Zeaxanthin. The relative hybridization signal obtained for each of the MT isoforms was normalized with internal controls, and the obtained arbitrary units converted into fold-change when comparing treatments against control.

| Gene                                                 | MT2A | MT1F | MT1G | MT1X |
|------------------------------------------------------|------|------|------|------|
| Control                                              | 1    | 1    | 1    | 1    |
| $100 \mu\text{M } ^{68}\text{ZnSO}_4$                | 14   | 20   | 67   | 28   |
| $100 \text{ U}\cdot\text{mL}^{-1} \text{ IL1}\alpha$ | 4    | 2    | 3    | 2    |
| $120 \text{ U}\cdot\text{mL}^{-1} \text{ EPO}$       | 1    | 1    | 1    | 1    |
| $5 \mu\text{M Lutein}$                               | 1    | 2    | 1    | 1    |
| $5 \mu\text{M Zeaxanthin}$                           | 0.9  | 1    | 1    | 0.8  |

## 2. Figures

**Figure S1.** Cell viability. Percentage of relative cell viability depending upon zinc concentration (0 to  $200 \mu\text{M}$  of Zn for 24 h). Mean  $\pm$  SD is plotted for 5 replicates for each condition.

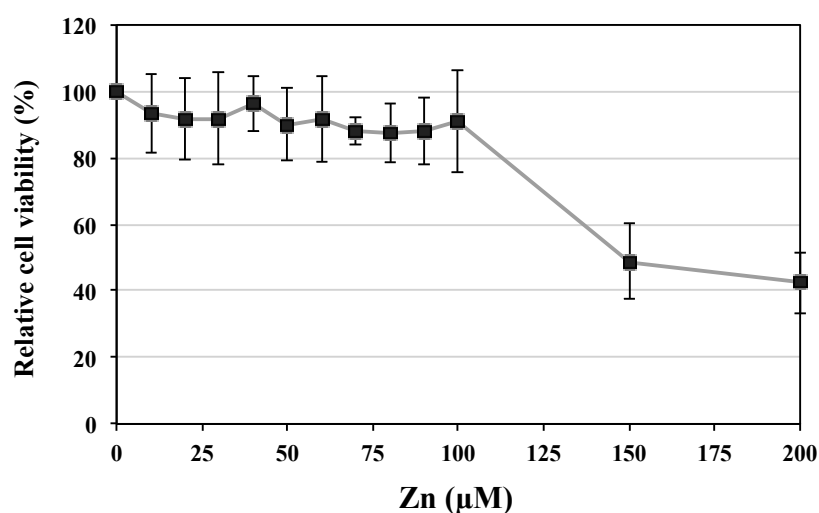

**Figure S2.** Cellular distribution of MT1/2 in HRPEsv cells by confocal microscopy. Columns: DAPI staining of cell nuclei micrographs (left); Alexa 488-labeled micrograph (middle); and merged image (right). Rows: A) Control; B) 100  $\mu$ M zinc treatment ( $^{68}\text{ZnSO}_4$  for 24 h); C) 5 mM AAPH treatment (1 h); D) 100  $\mu$ M zinc ( $^{68}\text{ZnSO}_4$ ) pre-treatment for 24 h followed by AAPH treatment (5mM for 1 h). Scale bar 25  $\mu$ m.

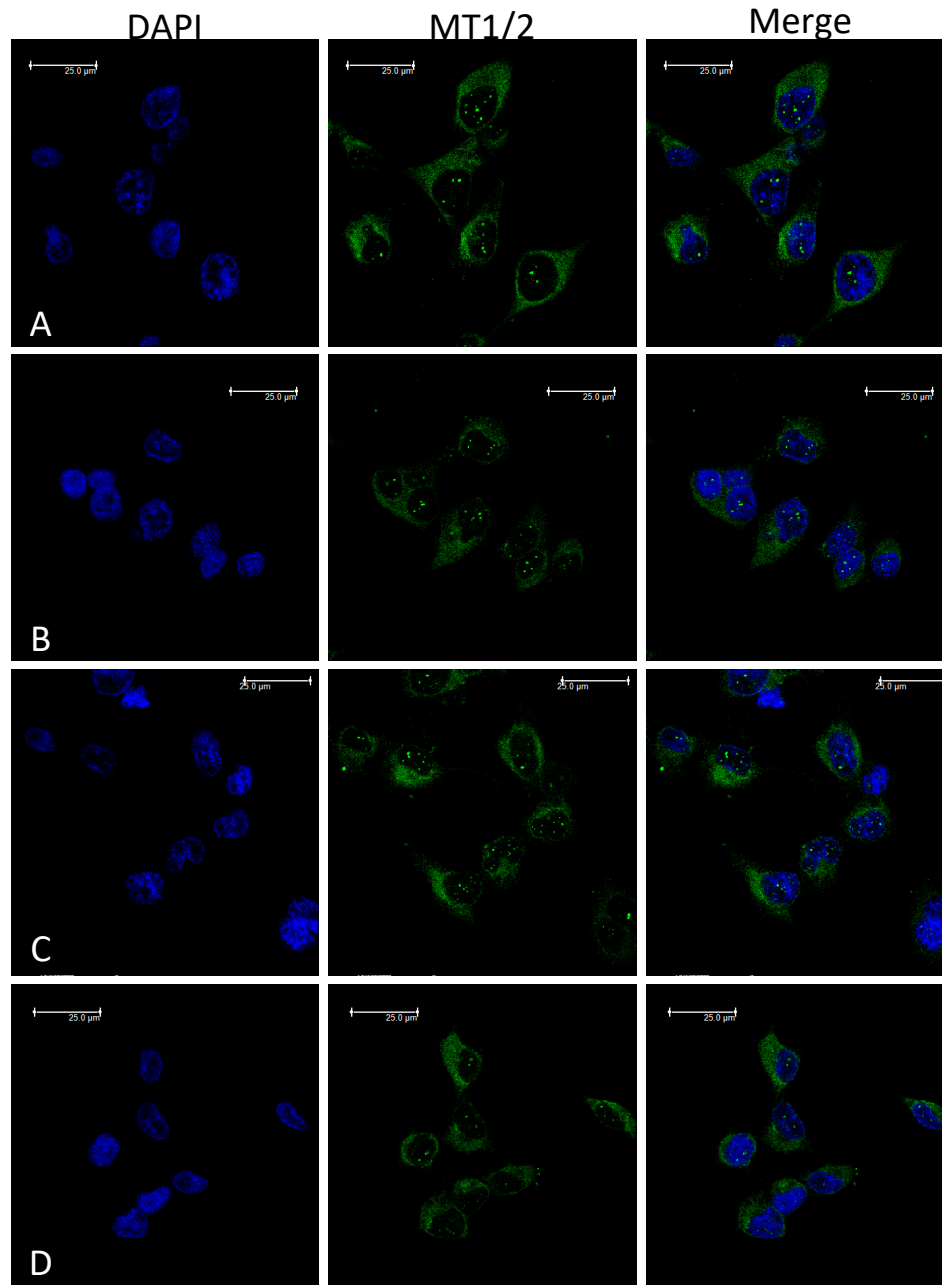

**Figure S3.** Zinc levels in non-treated and zinc-treated cells. Concentration of zinc ( $\mu\text{g Zn}\cdot\text{g}^{-1}$  protein) in MTs (black bars dotted), in proteins/biomolecules other than MTs (white bars dotted), and in all Zn-binding proteins/biomolecules (grey bars dotted) obtained by IDA-, IPD-, SEC (HPLC)-ICP-MS in the water-soluble proteins in HRPEsv cells not treated (control) or following exposure to  $^{68}\text{ZnSO}_4$  at 25, 50, or 100  $\mu\text{M}$ , for 24 h.

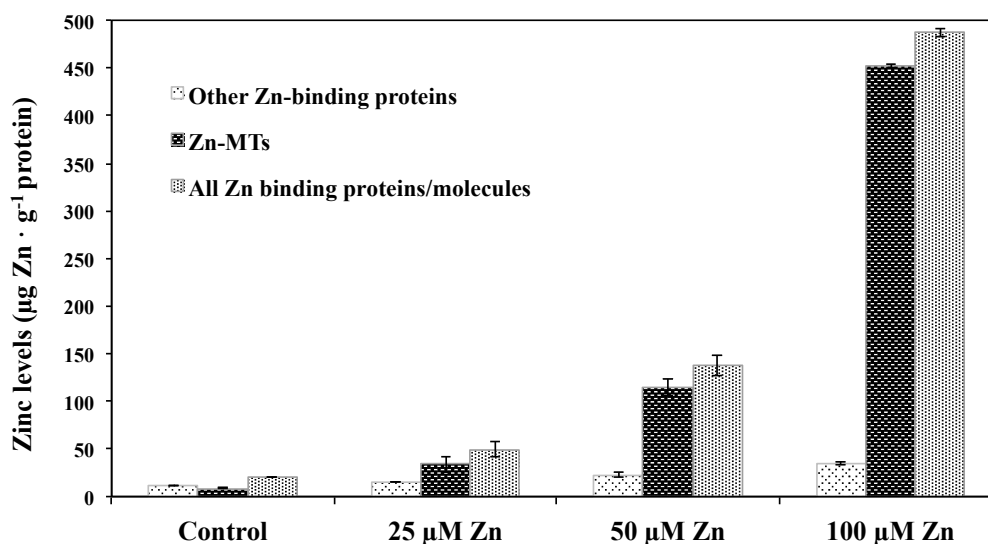

**Figure S4.** Levels of MTs in non-treated and zinc-treated cells. Concentration of MTs ( $\text{mg MTs}\cdot\text{g}^{-1}$  total protein) labeled with  $^{\text{nat}}\text{Zn}$  (natural contribution in light grey bars) or  $^{68}\text{Zn}$  (exogenous contribution in dark grey bars), obtained by ID-, IPD-, SEC-ICP-MS. HRPEsv cells were either not treated (control) or exposed to  $^{68}\text{ZnSO}_4$  at 25, 50 or 100  $\mu\text{M}$  separately for 24 h.

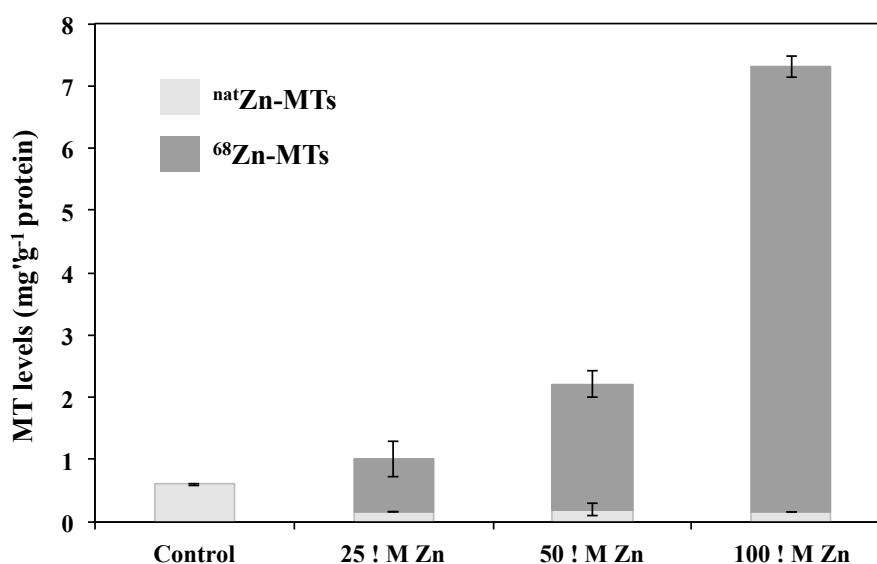

**Figure S5.** Zinc levels in non-treated or zinc pre-treated and subsequent APPH treated cells. Concentration of zinc ( $\mu\text{g Zn}\cdot\text{g}^{-1}$  protein) in MTs (black bars dotted), in proteins/biomolecules other than MTs (white bars dotted), and in all Zn-binding proteins/biomolecules (grey bars dotted) obtained by IDA-, IPD-, SEC (HPLC)-ICP-MS in the water-soluble proteins in HRPEsv cells not treated (control) or pretreated with  $^{68}\text{ZnSO}_4$  at 25, 50, or 100  $\mu\text{M}$  for 24 h and following exposure to 5 mM of APPH for 1 h.

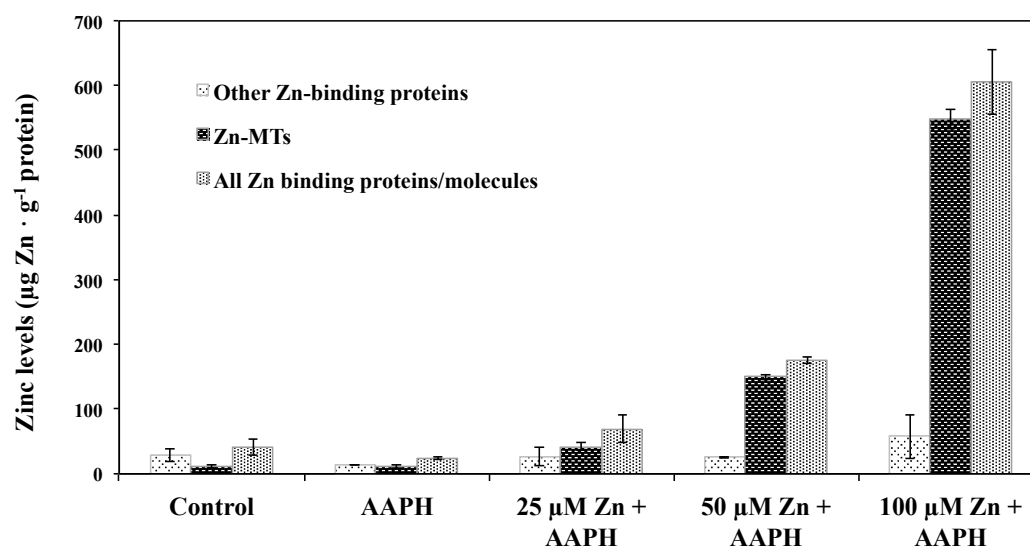

**Figure S6.** Levels of MTs in non-treated or zinc pre-treated and subsequent APPH treated cells. Concentration of MTs (mg MTs·g<sup>-1</sup> total protein) labeled with <sup>nat</sup>Zn (natural contribution in dark grey bars) or <sup>68</sup>Zn (exogenous contribution in dot bars), obtained by ID-, IPD-, SEC-ICP-MS. HRPEsv cells were either not treated (control) or pretreated with <sup>68</sup>ZnSO<sub>4</sub> at 25, 50, or 100 µM for 24 h and followed with an exposure with 5 mM of APPH for 1 h.

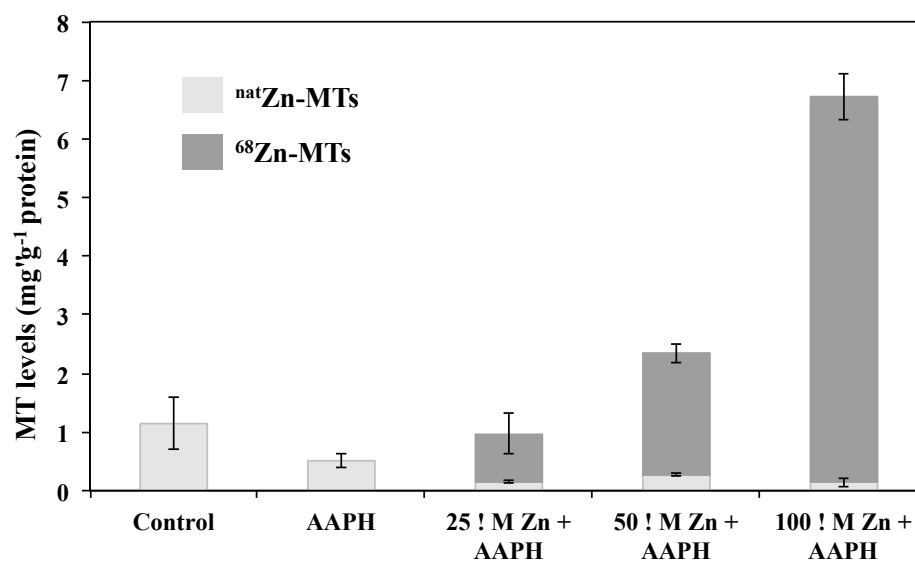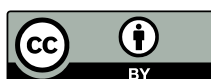

Supplement: Supplementary file 1 [file nutrients-10-01874-s001.pdf]
